# Supplementary material for: Prediction model study focusing on eHealth in the management of urinary incontinence: the Personalised Advantage Index as a decision-making aid
Source: HighWire-hosted journal article supplement (doi:10.1136/bmjopen-2021-051827), 2022-07-01

Supplemental Table 1. Summary of evidence from the literature review

| Reference                                                                                                   | Population                                     | Study                                                    | N       | Factors and effects                                                                                                                                                                                                                                                    | OR (95%CI) if available                                                                                                                                       |
|-------------------------------------------------------------------------------------------------------------|------------------------------------------------|----------------------------------------------------------|---------|------------------------------------------------------------------------------------------------------------------------------------------------------------------------------------------------------------------------------------------------------------------------|---------------------------------------------------------------------------------------------------------------------------------------------------------------|
| <b>Lifestyle</b>                                                                                            |                                                |                                                          |         |                                                                                                                                                                                                                                                                        |                                                                                                                                                               |
| Abrams 2018                                                                                                 | Women with SUI, UUI, MUI, obese or overweight. | Review, 4 studies. LS: Weight loss                       |         | Weight loss of 5% -><br>- reduction of UI symptoms,<br>- decrease pad test loss<br>- higher quality of life                                                                                                                                                            |                                                                                                                                                               |
| Wyman 2014                                                                                                  | Men and women with UUI, smokers.               | RCT. LS: Smoking                                         | N = 57  | Abstinence→<br>- Reduction urinary frequency                                                                                                                                                                                                                           |                                                                                                                                                               |
| Wells 2014                                                                                                  | Women with UUI.                                | RCT. LS: Caffeine intake                                 | N = 11  | Decrease intake of caffeine→<br>- Reduction of frequency and urgency of UI                                                                                                                                                                                             |                                                                                                                                                               |
| <b>Behavioral training for UI (PFMT or bladder training), predictors of success unless stated otherwise</b> |                                                |                                                          |         |                                                                                                                                                                                                                                                                        |                                                                                                                                                               |
| Burgio 2003                                                                                                 | Women with SUI, UUI, MUI                       | 3 RCTs. Behavioral training.                             | N = 258 | Predominantly UUI (N = 198):<br>- Lower frequency of UI episodes<br>- Previous surgery of UI, previous treatment with medication<br>- Lower educational level<br>Predominantly SUI (N = 60):<br>- No previous treatment for UI<br>- <10 incontinence episodes per week |                                                                                                                                                               |
| Cammu 2006                                                                                                  | Women with SUI.                                | Prospective cohort. Behavioral training.                 | N = 447 | <i>Predictors of failure of PFMT</i><br>- ≥2 leakage episodes per day<br>- chronic use of psychotropic medication<br>- baseline positive stress test                                                                                                                   |                                                                                                                                                               |
| Kim 2011                                                                                                    | Women with SUI, UUI, MUI                       | RCT. Behavioral training.                                | N = 127 | - Compliance to treatment<br>- BMI reduction                                                                                                                                                                                                                           | OR 1.13 (1.02-1.29)<br>OR 0.78 (0.60-0.96)                                                                                                                    |
| Dumoulin 2010                                                                                               | Women with SUI                                 | RCT. Behavioral training.                                | N = 57  | - baseline lower PFM passive force<br>- baseline greater PFM endurance                                                                                                                                                                                                 | OR 0.50 (0.301-0.830)<br>OR 1.02 (1.003-1.037)                                                                                                                |
| Hendriks 2010                                                                                               | Women with SUI.                                | Prospective cohort. Behavioral training.                 | N = 267 | <i>Predictors of poor outcome PFMT</i><br>- More severe stress UI<br>- POP-Q stage >II<br>- poor outcome previous physiotherapy intervention<br>- prolonged second stage of labor<br>- BMI>30<br>- high psychological distress<br>- poor physical health               | OR 0.09 (0.03-0.21)<br>OR 0.10 (0.01-1.05)<br>OR 0.05 (0.01-0.32)<br>OR 0.17 (0.05-0.56)<br>OR 0.28 (0.08-0.94)<br>OR 0.29 (0.11-0.89)<br>OR 0.32 (0.11-0.87) |
| Yoo 2011                                                                                                    | Women with SUI, UUI, MUI.                      | Retrospective cohort. Behavioral training                | N = 86  | - Change of average tonic contraction of PFM                                                                                                                                                                                                                           | OR 1.66 (1.015-2.721)                                                                                                                                         |
| Schaffer 2012                                                                                               | Women with SUI or MUI.                         | RCT. Behavioral training or pessary                      | N = 446 | - postmenopausal status<br>- higher educational level<br>- no previous UI surgery                                                                                                                                                                                      | OR 2.52 (1.29- 4.95)<br>OR 1.61 (1.01-2.55)<br>OR 3.15 (1.04-9.53)                                                                                            |
| <b>mHealth</b>                                                                                              |                                                |                                                          |         |                                                                                                                                                                                                                                                                        |                                                                                                                                                               |
| Lindh 2016                                                                                                  | Women with SUI.                                | RCT. Behavioral training (PFMT) via internet or brochure | N = 169 | - higher age<br>- regular performance of PFMT after 1 year                                                                                                                                                                                                             | OR 1.06 (1.02-1.10)<br>OR 2.32 (1.04-5.20)                                                                                                                    |
| Nystrom 2017                                                                                                | Women with SUI.                                | Cohort from RCT. Behavioral training (PFMT) via app.     | N = 61  | - higher expectations of treatment effect<br>- weight control (per kg gained)<br>- self-rated improvement of PFM strength                                                                                                                                              | OR 11.38 (2.02-64.19)<br>OR 0.44 (0.24-0.79)<br>OR 35.54 (4.96-254.61)                                                                                        |
| Vitacca 2015                                                                                                | COPD patients                                  | Review of telemonitoring outcomes from RCTs              | 46 RCTs | - higher age<br>- worse severity of disease and more frequent exacerbations<br>- limited community support<br>- home care not widely available                                                                                                                         | Not applicable                                                                                                                                                |

Behavioral training = Pelvic Floor Muscle Training and/or bladder training. Abbreviations: SUI = Stress urinary incontinence, UUI = Urgency urinary incontinence, MUI = Mixed urinary incontinence, LS = Lifestyle change.

**Supplemental Table 2. Complete list of candidate predictors and selected predictors for successful UI treatment by care-as-usual and eHealth**

| Candidate predictors                                          | Related to conservative management and/or eHealth | Literature and/or expert opinion | Available in data | Selected *with expected interaction treatment |
|---------------------------------------------------------------|---------------------------------------------------|----------------------------------|-------------------|-----------------------------------------------|
| Age                                                           | both                                              | both                             | yes               | Yes*                                          |
| Educational level                                             | Conservative management                           | literature                       | yes               | Yes*                                          |
| Smoking                                                       | Conservative management                           | literature                       | -                 | -                                             |
| Caffeine consumption                                          | Conservative management                           | literature                       | yes               | -                                             |
| Body Mass Index (BMI)                                         | Conservative management                           | literature                       | yes               | Yes                                           |
| Limited care available/ lower mobility of patient             | eHealth                                           | literature                       | yes               | -                                             |
| Poor physical health status                                   | Conservative management                           | literature                       | yes               | Yes                                           |
| Self-efficacy                                                 | eHealth                                           | Expert                           | -                 | -                                             |
| Being a caregiver to a sick spouse or parent                  | eHealth                                           | Expert                           | yes               | -                                             |
| Having a job                                                  | eHealth                                           | Expert                           | yes               | -                                             |
| Social support                                                | eHealth                                           | Expert                           | -                 | -                                             |
| UI: severity                                                  | Both                                              | literature                       | yes               | Yes                                           |
| UI: frequency                                                 | Conservative management                           | literature                       | yes               | -                                             |
| UI: type                                                      | Conservative management                           | Both                             | yes               | Yes*                                          |
| UI: duration of symptoms                                      | Conservative management                           | Expert                           | yes               | Yes*                                          |
| UI impact on quality of life                                  | Conservative management                           | Expert                           | yes               | Yes*                                          |
| Menopausal state                                              | Conservative management                           | literature                       | yes               | Yes                                           |
| Vaginal births                                                | Conservative management                           | literature                       | yes               | Yes                                           |
| Pelvic floor muscle function at baseline                      | Conservative management                           | literature                       | yes               | Yes                                           |
| Prolapse according to POPQ system                             | Conservative management                           | literature                       | yes               | -                                             |
| Sense of pelvic floor muscles                                 | Conservative management                           | Expert                           | -                 | -                                             |
| Expectations of treatment                                     | eHealth                                           | literature                       | -                 | -                                             |
| Adherence to treatment                                        | Both                                              | Both                             | -                 | -                                             |
| Duration of treatment                                         | Conservative management                           | literature                       | -                 | -                                             |
| Previous treatment                                            | Conservative management                           | literature                       | yes               | Yes*                                          |
| Previous experience with smartphone or tablet (digital) usage | eHealth                                           | Expert                           | -                 | -                                             |
| eHealth literacy                                              | eHealth                                           | Expert                           | -                 | -                                             |
| Follow-up yes or no                                           | eHealth                                           | Expert                           | yes               | -                                             |
| Recruitment method (GP or (social) media)                     | eHealth                                           | Expert                           | Yes               | Yes*                                          |

Abbreviations: UI = urinary incontinence

**Supplemental Table 3. Inclusion frequencies of the regression coefficients from 500 bootstrap samples**

| Variable                                         | Bootstrap               |                          |
|--------------------------------------------------|-------------------------|--------------------------|
|                                                  | inclusion frequency (%) | 95% confidence intervals |
| Intercept                                        |                         | 7.21 to 7.89             |
| Treatment type, App (-0.5) or CAU (0.5)*         | 100                     | -0.69 to 0.51            |
| Age, yrs*                                        | 25                      | -0.03 to 0.02            |
| Educational level, lower (-0.5) or higher (0.5)* | 23                      | -0.52 to 0.763           |
| UI Severity <sub>at baseline</sub>               | 100                     | 0.43 to 0.74             |
| Impact of UI on Quality of Life *                | 96                      | 0.03 to 0.14             |
| Age*Treatment type                               | 80                      | 0.01 to 0.10             |
| Educational level*Treatment type                 | 94                      | 0.44 to 2.99             |
| Impact on Quality of life*Treatment type         | 62                      | 0.01 to 0.14             |

\*Treatment type and the main effects of the interactions (Age, Educational level, Impact on quality of life) were fixed in the backward selection procedure. CAU = care-as-usual, UI = urinary incontinence

**Supplemental Table 4. Comparison baseline characteristics of patients with and without a clinically relevant Personalized advantage index (PAI larger than minimal clinically relevant difference of 1.58 points).**

|                           | Characteristic                        | Total<br>(n = 262) | PAI >1.58<br>(n = 55) | PAI <1.58<br>(n = 207) |
|---------------------------|---------------------------------------|--------------------|-----------------------|------------------------|
| <b>Prognostic Factors</b> | Severity UI at baseline*              | 9.9 ± 3.3          | 10.7 ± 3.4            | 9.7 ± 3.2              |
|                           | Body mass index (kg/m <sup>2</sup> )* | 27.8 ± 5.3         | 28.2 ± 5.1            | 27.6 ± 5.4             |
|                           | Postmenopausal status, yes            | 123 (47.1%)        | 32 (58.2%)            | 91 (44.2%)             |
|                           | Vaginal births, ≥1                    | 216 (82.8%)        | 42 (76.4%)            | 174 (84.1%)            |
|                           | Pelvic floor muscle function          |                    |                       |                        |
|                           | Normal activity                       | 84 (32.1%)         | 12 (21.8%)            | 72 (34.5%)             |
|                           | Overactive                            | 44 (16.8%)         | 11 (20.0%)            | 33 (15.9%)             |
|                           | Underactive                           | 134 (50.8%)        | 32 (58.2%)            | 101 (48.8%)            |
|                           | General physical health status*       | 74 ± 20            | 73 ± 21               | 74 ± 20                |
| <b>Modifiers</b>          | Age, (years)                          | 52.2 ± 11.6        | 54.1 ± 14.9           | 51.8 ± 10.6            |
|                           | Educational level, higher*            | 107 (52.7%)        | 23 (56.1%)            | 84 (51.9%)             |
|                           | Duration of UI (years)*               | 7 (4-14)           | 7 (4-14)              | 7 (4-14)               |
|                           | UI impact on Quality of life*         | 33.6 ± 8.0         | 35.9 ± 9.9            | 33.0 ± 7.4             |
|                           | Type of UI                            |                    |                       |                        |
|                           | Stress                                | 180 (68.7%)        | 30 (54.5.4%)          | 150 (72.5%)            |
|                           | Urgency                               | 82 (31.3%)         | 25 (45.4%)            | 57 (27.5%)             |
|                           | Previous physical therapy for UI, yes | 66 (25.3%)         | 10 (18.2%)            | 56 (27.2%)             |
|                           | Recruitment type                      |                    |                       |                        |
|                           | General practitioner                  | 152 (58%)          | 33 (60.0%)            | 119 (57.5%)            |
| Lay press or social media | 110 (42%)                             | 22 (40.0%)         | 88 (42.5%)            |                        |

Prognostic factors predict outcomes irrespective of treatment type. Modifiers predict outcomes dependent on the treatment (modifier). Values are presented as means ± standard deviation, percentages, or medians (interquartile range). \*N was lower: missing data of one baseline assessment, three baseline questionnaires, and educational level were assessed at follow-up. Abbreviations: ICIQ-UISF, International Consultation on Incontinence Modular Questionnaire Urinary Incontinence Short Form; ICIQ-LUTSqol, ICIQ lower urinary tract symptoms quality of life; UI, urinary incontinence.

**Supplemental Figure 1.** Calibration slope of observed versus predicted end-UISF scores (prediction based on the main model).

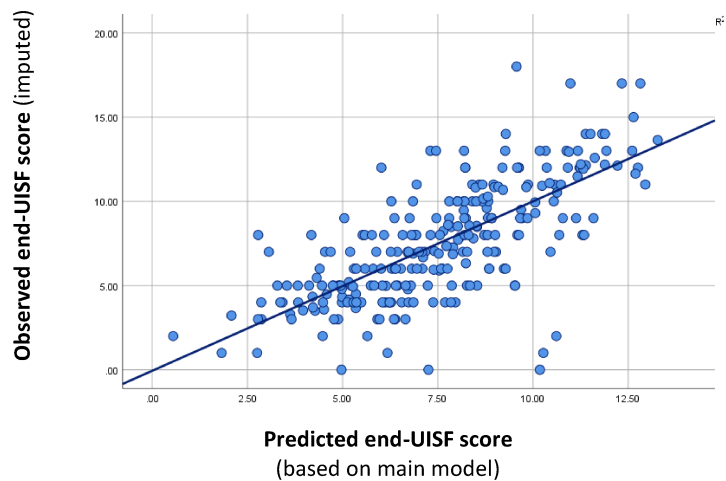

The calibration intercept is at -0.06 and the calibration slope is 1.01.

**Supplemental Figure 2.** Scatterplot of observed versus predicted end-UISF scores (predicted score of treatment received in the trial)

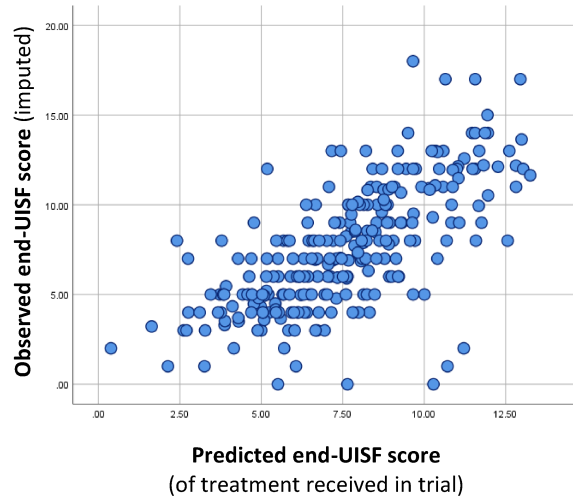

Supplement: bmjopen-2021-051827supp001_data_supplement.pdf [file bmjopen-2021-051827supp001_data_supplement.pdf]
